# Supplementary material for: Choroidal thickness in patients with coronary artery disease
Source: PLoS One. 2017 Jun 20;12(6):e0175691. doi: 10.1371/journal.pone.0175691 (PMC5478094; doi:10.1371/journal.pone.0175691)
Supplement: S1 Table — Choroidal thickness values at five cardinal macular locations for cases and controls prior to data analysis. (XLSX) [file pone.0175691.s001.xlsx]

## Sheet: CAD
	SF CTh (µm)	N CTh (µm)	T CTh (µm)	S CTh (µm)	I CTh (µm)
CAD001	271	261	204.5	218.5	285
CAD002	124	76	172.5	128.5	108
CAD003	255	153	244	281	248
CAD004	285	161.5	255.5	212	225
CAD005	128.5	94.5	145.5	140	106
CAD006	241.5	159	211.5	191	186
CAD007	126.5	48.5	163	117	117.5
CAD008	324	280.5	255	305.5	230
CAD009	310	236.5	275.5	291.5	365.5
CAD010	301	231.5	228	278	361
CAD011	331	280.5	328.5	347	195.5
CAD012	278	195	192.5		195.5
CAD013	241.5	196	234	349	269
CAD014	340.5	262	271	317	237.5
CAD015	193.5	108	133.5	184.5	207
CAD016	317	244	216.5	305.5	186
CAD017	227.5	140.5	186.5	218.5	255.5
CAD018	259.5	263.5	223	266.5	109
CAD019	218.5	181.5	209	190.5	195.5
CAD020	214	184.5	207	243.5	257
CAD021	250.5	179	223	328.5	335.5
CAD022	246	203	244	211.5	312.5
CAD023	282.5	235	221	315	225.5
CAD024	303.5	248.5	239	356.5	220.5
CAD025	289	314	223.5	317.5	370
CAD026	172.5	153.5	154	230	179
CAD027	204.5	170	228	195.5	197.5
CAD028	323	184			275
CAD029	262	204.5	207	305.5	161
CAD030	232	133.5	156.5	268.5	216
CAD031	289.5	197.5	301	296.5	237
CAD032	201	241	184.5	282.5	296.5
CAD033	317	274	211.5	324	246
CAD034	218.5	246	227.5	319	358.5
Mean	252.324	198.265	217.485	260.484	234.412
SD	58.7992	62.8219	42.9885	66.5828	73.0804
CAD, coronary artery disease
SD, standard deviation
CTh, choroidal thickness
SF, subfoveal
N, nasal
T, temporal
S, superior
I, inferior

## Sheet: CONTROL 
	SF CTh (µm)	N CTh (µm)	T CTh (µm)	S CTh (µm)	I CTh (µm)
CNTRL1	351.5	317	283.5	368	342
CNTRL2	373.5	296	335.5	376.5	376.5
CNTRL3	278	270.5	271.5	374.5	259.5
CNTRL4	320	282.5	267		366.5
CNTRL5	276	267.5	281.5	265.5	324
CNTRL6	264.5	214.5	282.5	265	230
CNTRL7	264	254	198.5	358.5	335.5
CNTRL8	374.5	307	342	331	344.5
CNTRL9	328.5	239.5	267	310	304
CNTRL10	388	287		413.5	328.5
CNTRL11	294	252	249	340	230
CNTRL12	363	296.5	312.5	400	436.5
CNTRL13	243.5	223.5	248.5	266.5	262
CNTRL14	303.5	282.5	289	331	331
CNTRL15	393	356		333	358.5
CNTRL16	310	179.5	336.5	301	354
CNTRL17	138.5	98	208.5	172	200
CNTRL18	291.5	272		312	365.5
CNTRL19	416	368.5	319.5	372	384
CNTRL20	273.5	217	259.5	335.5	303
CNTRL21	351.5	219	280.5	340	342.5
CNTRL22	335.5	198	264	308	273
CNTRL23	291.5	165	218.5
CNTRL24	296.5	263	233	370
CNTRL25	282.5	227	256	264	257.5
CNTRL26	223	190.5	244	289.5	321.5
CNTRL27	264	222.5	211.5	310	232
CNTRL28	181.5	86	134	218.5	170.5
Mean	302.536	244.714	263.74	320.212	308.942
SD	63.1984	65.3313	47.8239	55.7294	63.5525
CNTRL, control
SD, standard deviation
CTh, choroidal thickness
SF, subfoveal
N, nasal
T, temporal
S, superior
I, inferior
